# Supplementary material
Source: bioRxiv or medRxiv preprint supplement (https://www.biorxiv.org/highwire/filestream/28069/field_highwire_adjunct_files/1/099168-2.pdf)
Supplement: Supplementary file [file 099168-2.pdf]

**Supplementary Table 5**

Quality control standards for evaluating manual annotations

| <b>QC remark</b> | <b>Criterion</b>                                                                                 |
|------------------|--------------------------------------------------------------------------------------------------|
| A                | 1. Evidence for 100%+ of exons (RNAseq or proteomics is best, blast hits may be allowed)         |
|                  | 2. Final protein length +- 10% of similar gene in related species                                |
|                  | 3. Similar exon count/order to gene in related species                                           |
|                  |                                                                                                  |
| B                | 1. Evidence for 90%+ of exons (RNAseq or proteomics is best, blast hits may be allowed)          |
|                  | 2. Final protein length +- 25% of similar gene in related species                                |
|                  |                                                                                                  |
| C                | 1. Evidence for less than 90% of exons (RNAseq or proteomics is best, blast hits may be allowed) |
|                  | 2. Final protein length +- 50% of similar gene in related species                                |
|                  |                                                                                                  |
| D                | Not accepted in current form                                                                     |
